# Supplementary material for: Doxorubicin-loaded fluorescent carbon dots with PEI passivation as a drug delivery system for cancer therapy
Source: Royal Society of Chemistry journal article supplement (doi:10.1039/d0nr01236j), 2020-01-01
Supplement: d0nr01236j1.pdf [file d0nr01236j1.pdf]

## Supporting information

# Doxorubicin-loaded fluorescent carbon dots with PEI passivation as a drug delivery system for cancer therapy

Yu Hailing<sup>1#</sup>, Lv Xiufang<sup>1#</sup>, Wu Lili<sup>3#</sup>, Li Baoqiang<sup>4#</sup>, Huang Kaichen<sup>1,5</sup>, Huang Yongquan<sup>1</sup>, Zhang Qianqian<sup>1</sup>, Mei Chaoming<sup>1</sup>, Ren Xiaoshuai<sup>1</sup>, Zhou Rui<sup>6</sup>, Luo Hui<sup>1\*</sup>, Pang Pengfei<sup>1,2\*</sup>, Shan Hong<sup>1,2</sup>

1. Guangdong Provincial Key Laboratory of Biomedical Imaging and Guangdong Provincial Engineering Research Center of Molecular Imaging, The Fifth Affiliated Hospital, Sun Yat-Sen University, Zhuhai, Guangdong Province 519000, P. R. China
2. Center for Interventional Medicine, The Fifth Affiliated Hospital, Sun Yat-Sen University, Zhuhai, Guangdong Province 519000, P. R. China
3. Key Laboratory for Photonic and Electronic Bandgap Materials, Ministry of Education, School of Physics and Electronic Engineering, Harbin Normal University, Harbin 150025, Heilongjiang Province 150001, P. R. China
4. Center for Engineering Training and Basic Experimentation, Heilongjiang University of Science and Technology, Harbin 150022, Heilongjiang Province 150001, P. R. China
5. Institute for Advanced Ceramics, State Key Laboratory of Urban Water Resource and Environment, Harbin Institute of Technology, Harbin, Heilongjiang Province 150001, P. R. China
6. Institute of Antibody Engineering, School of Laboratory Medicine and Biotechnology, Southern Medical University, Guangzhou, Guangdong Province 510000, P. R. China
7. State Key Laboratory for Mechanical Behavior of Materials, Xi'an Jiaotong University, Xi'an, Shanxi Province 710049, P. R. China

Corresponding authors: pangpf@mail.sysu.edu.cn; luoh53@mail.sysu.edu.cn

# These authors contributed equally to this article.

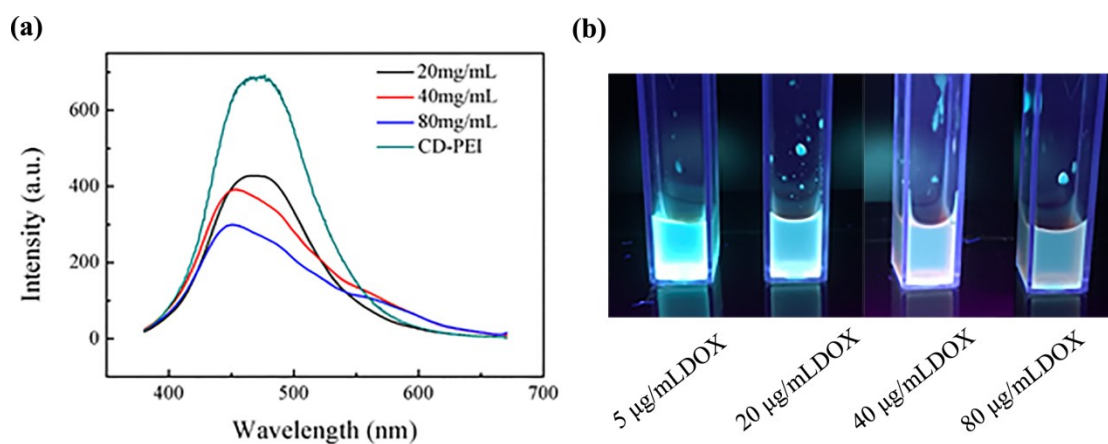

Fig. s1 (a) Fluorescence spectra of CD-PEI-DOX solution with increasing concentrations of DOX at an excitation of 380 nm. (b) Optical images of the fluorescence of the CD-PEI-DOX solutions. The concentrations of DOX are 5–80  $\mu\text{g mL}^{-1}$ .

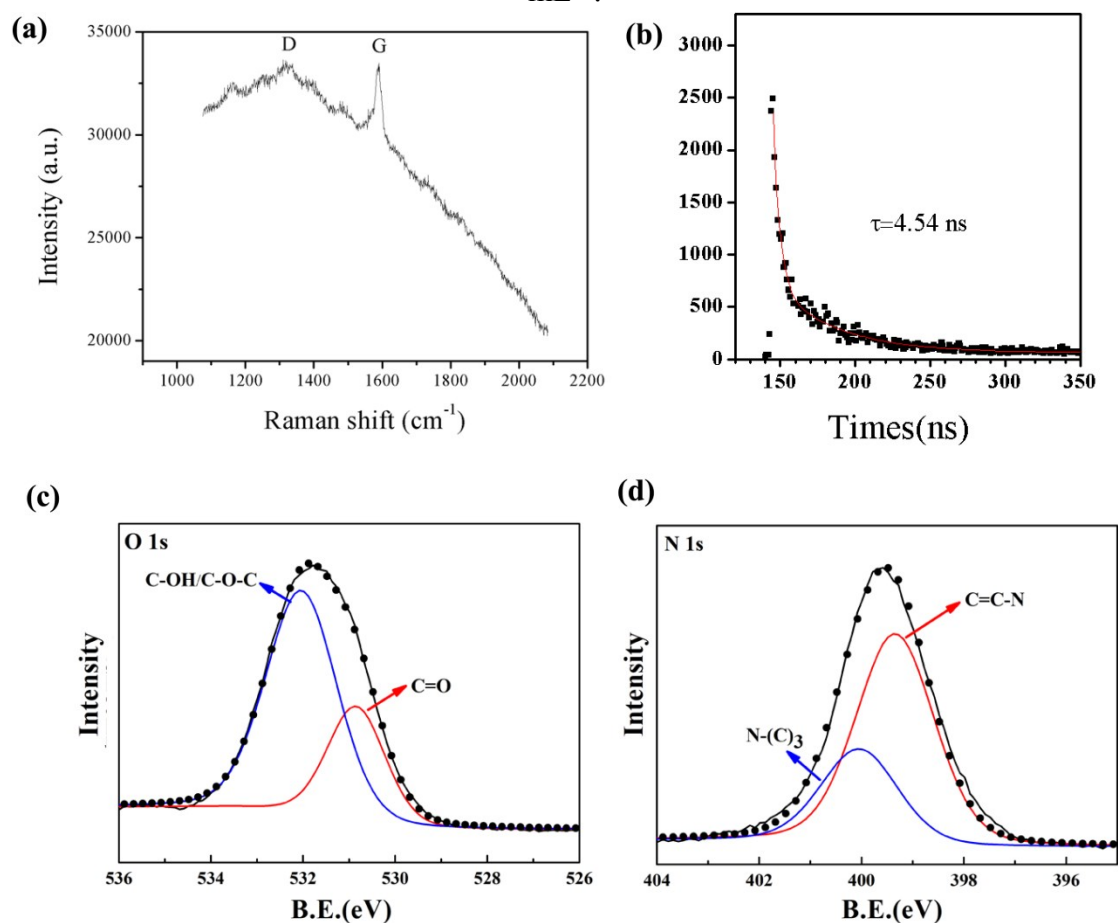

Fig. s2 (a) Raman spectrum of CD-PEI. (b) Typical time-resolved fluorescence-decay curve of CD-PEI. (c) O 1s and (d) N 1s spectra of CD-PEI.

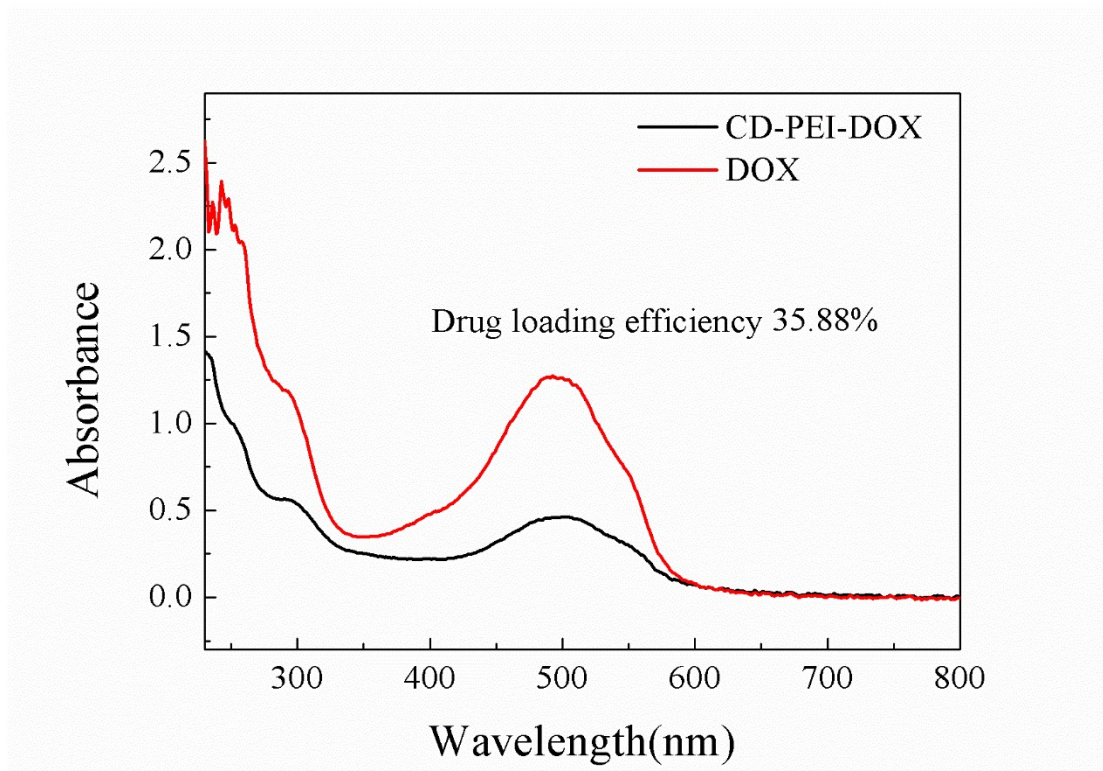

Fig. s3 UV-Vis absorption spectra of DOX and CD-PEI-DOX.

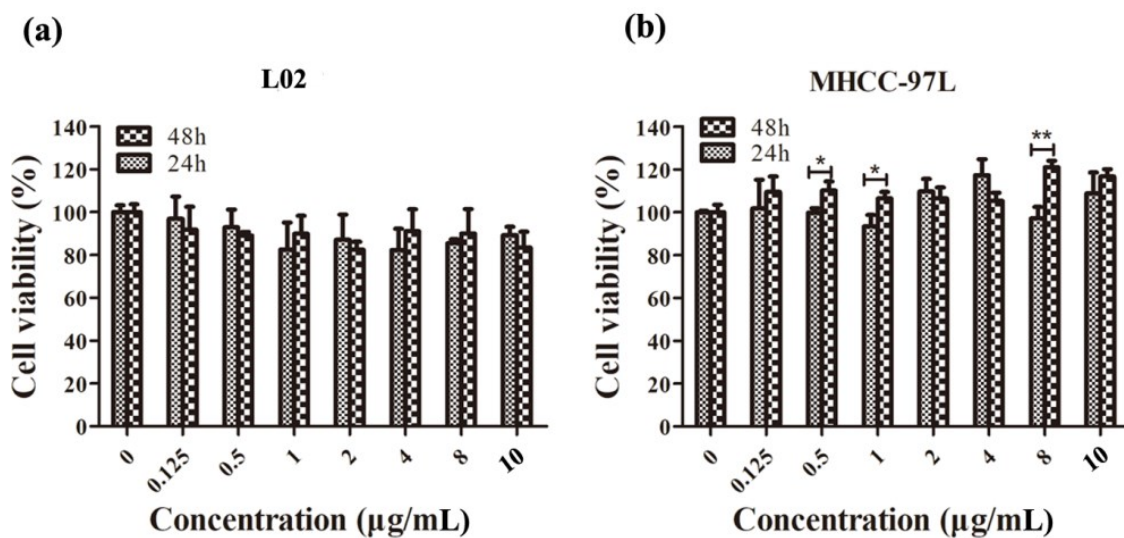

Fig. s4 Viability of L02 and MHCC-97L cells in the MTS assay after incubation with CD-PEI for 24 h or 48 h.

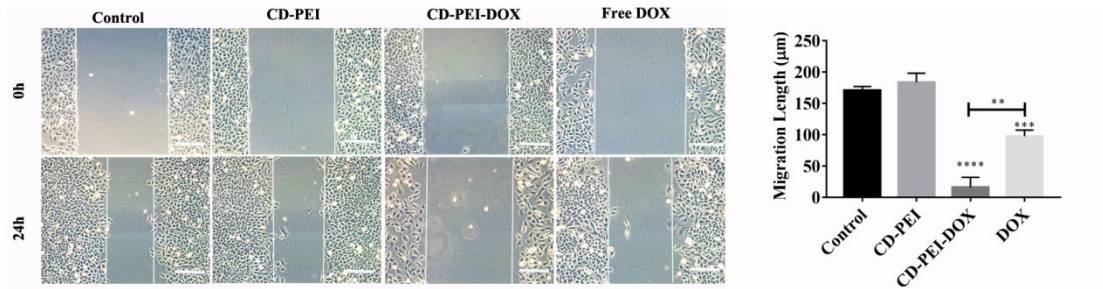

Fig. s5 Wound-healing ability and quantification of wound healing in MHCC-97L cells after treatment with PBS, CD-PEI, CD-PEI-DOX, or free DOX for 48 h. Scale bar, 100 µm.

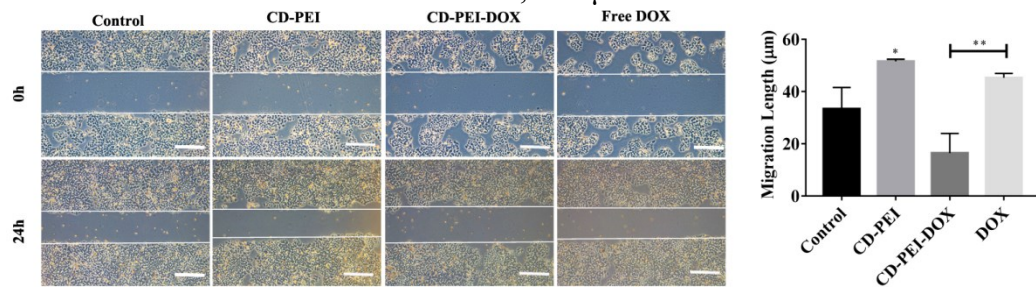

Fig. s6 Wound-healing ability and quantification of wound healing in Hep3B cells after treatment with PBS, CD-PEI, CD-PEI-DOX, or free DOX for 48 h. Scale bar, 100 µm.

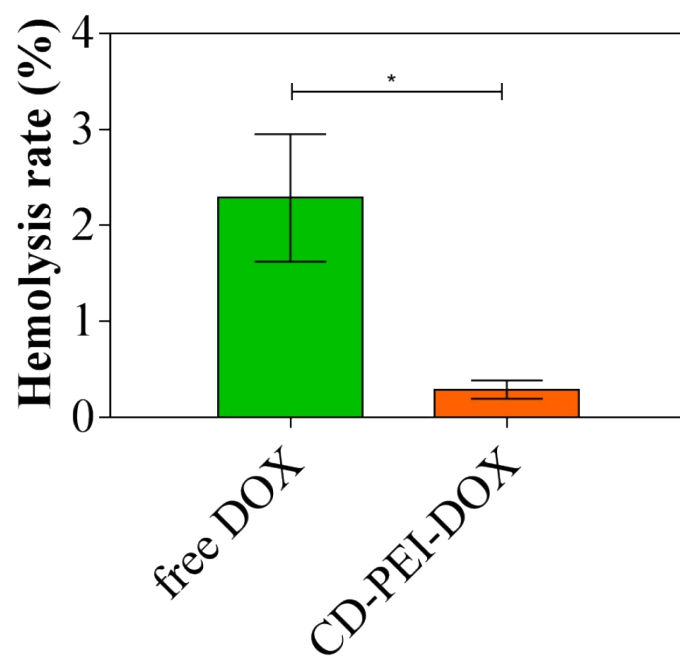

Fig. s7 Hemolysis rate of CD-PEI-DOX and free DOX.

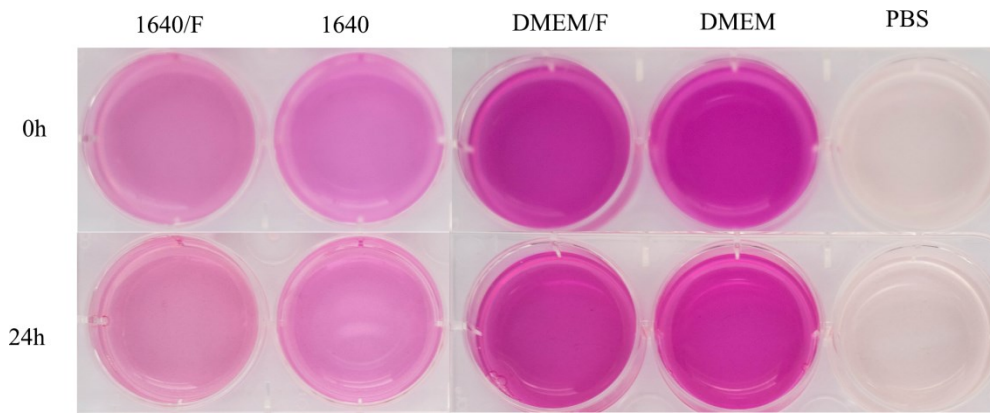

Fig. s8 Stability of CD-PEI-DOX in different solutions after incubation for 24 h.

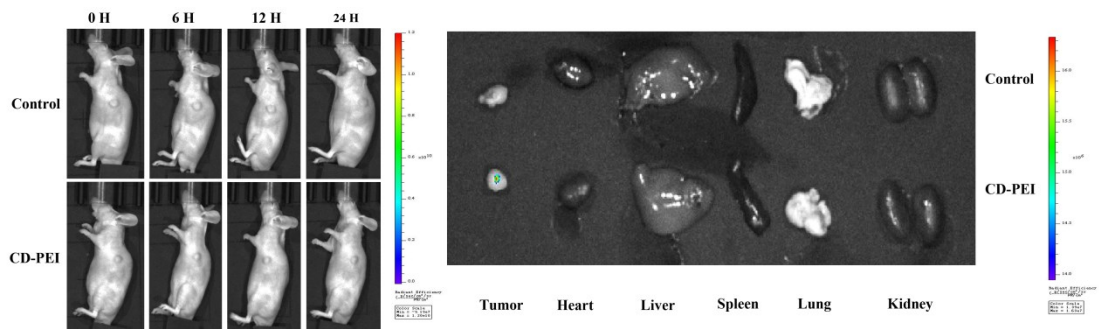

Fig. s9 Fluorescence images of mice injected with PBS or CD-PEI *in vivo* and *ex vivo*.
